# Supplementary material for: pH-Controlled assembly of [ZnW12O40]6−-based hybrids from a 0D dimer to a 2D network: synthesis, crystal structure, and photocatalytic performance in transformation of toluene into benzaldehyde
Source: Royal Society of Chemistry journal article supplement (doi:10.1039/d1dt02618f), 2021-01-01
Supplement: d1dt02618f1.pdf [file d1dt02618f1.pdf]

## Supporting Information

### **pH-controlled assembly of $[\text{ZnW}_{12}\text{O}_{40}]^{6-}$ -based hybrids from 0D dimer to 2D network: synthesis, crystal structure, and photocatalytic performance in transformation of toluene into benzaldehyde**

Ke-Ke Guo, Yan-Li Yang, Xin-Ye Jiang, Feng-Yan Li\*, Si-Meng Dong, and Lin Xu\*

Key Laboratory of Polyoxometalate and Reticular Material Chemistry of Ministry of Education, Faculty of Chemistry, Northeast Normal University, Changchun, Jilin 130024, P. R. China.

E-mail: [linxu@nenu.edu.cn](mailto:linxu@nenu.edu.cn); [lify525@nenu.edu.cn](mailto:lify525@nenu.edu.cn)

**Table S1.** Selected bond lengths (Å) and bond angles (°) of **1-3**.

| <b>Compound 1</b>                      |           |                         |           |
|----------------------------------------|-----------|-------------------------|-----------|
| Zn1-O34                                | 1.866(13) | Cu1 <sup>i</sup> -O5    | 2.270(14) |
| Zn1-O37                                | 1.841(13) | Cu2-O2                  | 1.936(13) |
| Zn1-O35                                | 1.856(14) | Cu2-O42                 | 2.015(13) |
| Zn1-O36                                | 1.893(13) | Cu2-O41                 | 2.246(13) |
| Cu1-N1                                 | 2.022(17) | Cu2-N3                  | 1.969(17) |
| Cu1-N2                                 | 1.974(18) | Cu3-O43                 | 1.943(18) |
| Cu1-O51                                | 1.968(14) | Cu3-O44                 | 1.974(17) |
| Cu1-O5 <sup>i</sup>                    | 2.270(14) | Cu3-O45                 | 2.268(17) |
| Cu1-O1                                 | 1.976(13) | Cu3-N5                  | 1.974(18) |
| O35-Zn1-O36                            | 108.6(6)  | O2-Cu2-N5               | 92.8(7)   |
| O35-Zn1-O34                            | 107.9(6)  | O2-Cu2-N6               | 152.4(16) |
| O37-Zn1-O36                            | 108.3(6)  | O2-Cu2-N7               | 105.2(18) |
| O37-Zn1-O35                            | 111.1(6)  | O2-Cu2-N8               | 94.2(10)  |
| O37-Zn1-O34                            | 109.5(6)  | O1-Cu1-O5 <sup>i</sup>  | 109.4(5)  |
| O34-Zn1-O36                            | 111.4(6)  | O1-Cu1-N1               | 154.3(6)  |
| O2-Cu2-O42                             | 88.0(5)   | O51-Cu1-O1              | 86.4(6)   |
| O2-Cu2-O41                             | 101.2(5)  | O51-Cu1-O5 <sup>i</sup> | 88.0(6)   |
| O2-Cu2-N3                              | 93.9(7)   | O51-Cu1-N2              | 176.5(7)  |
| O2-Cu2-N4                              | 169.5(6)  | O51-Cu1-N1              | 97.8(6)   |
| O42-Cu2-O41                            | 89.7(5)   | N2-Cu1-O1               | 95.7(6)   |
| N3-Cu2-O42                             | 169.8(6)  | N2-Cu1-O5 <sup>i</sup>  | 88.6(6)   |
| N3-Cu2-O41                             | 99.7(6)   | N2-Cu1-N1               | 81.6(7)   |
| N3-Cu2-N4                              | 83.0(7)   | N1-Cu1-O5 <sup>i</sup>  | 96.1(6)   |
| N4-Cu2-O42                             | 93.3(6)   | N6-Cu3-N5               | 81.4(7)   |
| N4-Cu2-O41                             | 89.2(6)   | N6-Cu3-O44              | 95.3(8)   |
| Symmetry codes: (i) $-x+1, -y, -z+1$ . |           |                         |           |
| <b>Compound 2</b>                      |           |                         |           |
| Zn1-O40                                | 1.901(17) | Cu1-O41                 | 1.95(2)   |
| Zn1-O38                                | 1.903(16) | Cu2-O43                 | 1.98(2)   |
| Zn1-O39                                | 1.891(15) | Cu2-O44                 | 1.97(2)   |
| Zn1-O37                                | 1.906(17) | Cu2-N3                  | 2.02(3)   |
| Cu1-O22                                | 1.967(18) | Cu2-O42                 | 2.33(3)   |
| Cu1-N1                                 | 2.04(2)   | Cu2-N4                  | 1.98(3)   |
| Cu1-N2                                 | 2.00(3)   | O17-Cu1 <sup>ii</sup>   | 2.24(2)   |
| Cu1-O17 <sup>i</sup>                   | 2.24(2)   |                         |           |
| O40-Zn1-O38                            | 111.0(7)  | O39-Zn1-O40             | 107.7(7)  |
| O40-Zn1-O37                            | 109.2(7)  | O39-Zn1-O38             | 109.7(7)  |
| O38-Zn1-O37                            | 110.2(7)  | O39-Zn1-O37             | 109.1(7)  |
| O22-Cu1-N1                             | 169.3(8)  | O43-Cu2-N3              | 168.6(10) |
| O22-Cu1-N2                             | 94.0(9)   | O43-Cu2-O42             | 94.7(11)  |

|                                                                         |           |                         |           |
|-------------------------------------------------------------------------|-----------|-------------------------|-----------|
| O22-Cu1-O17 <sup>i</sup>                                                | 102.1(7)  | O44-Cu2-O43             | 91.4(10)  |
| N1-Cu1-O17 <sup>i</sup>                                                 | 87.7(8)   | O44-Cu2-N3              | 94.4(10)  |
| N2-Cu1-N1                                                               | 80.1(11)  | O44-Cu2-O42             | 89.4(11)  |
| N2-Cu1-O17 <sup>i</sup>                                                 | 98.8(9)   | O44-Cu2-N4              | 175.6(10) |
| O41-Cu1-O22                                                             | 88.2(8)   | N3-Cu2-O42              | 95.2(11)  |
| O41-Cu1-N1                                                              | 95.4(10)  | N4-Cu2-O43              | 92.7(10)  |
| O41-Cu1-N2                                                              | 165.9(11) | N4-Cu2-N3               | 81.8(10)  |
| O41-Cu1-O17 <sup>i</sup>                                                | 94.4(10)  | N4-Cu2-O42              | 88.7(11)  |
| Symmetry codes: (i) $-x+1/2, y-1/2, z$ ; (ii) $-x+1/2, y+1/2, z$ .      |           |                         |           |
| <b>Compound 3</b>                                                       |           |                         |           |
| Zn1-O35                                                                 | 1.890(8)  | Cu2-O43                 | 2.018(8)  |
| Zn1-O33                                                                 | 1.884(8)  | Cu2-O5 <sup>i</sup>     | 2.323(8)  |
| Zn1-O36                                                                 | 1.845(8)  | Cu2-N3                  | 1.981(9)  |
| Zn1-O34                                                                 | 1.821(8)  | Cu2-N4                  | 1.985(9)  |
| Cu1-O39 <sup>ii</sup>                                                   | 1.930(8)  | O5-Cu2 <sup>iii</sup>   | 2.323(8)  |
| Cu1-O1                                                                  | 1.946(8)  | Cu3-O42                 | 1.954(9)  |
| Cu1-N1                                                                  | 2.003(10) | Cu3-N5                  | 1.968(11) |
| Cu1-N2                                                                  | 1.985(9)  | Cu3-N6                  | 1.998(10) |
| O39-Cu1 <sup>ii</sup>                                                   | 1.930(8)  | Cu3-O41                 | 1.971(11) |
| Cu2-O2                                                                  | 1.967(8)  |                         |           |
| O33-Zn1-O35                                                             | 112.6(4)  | O2-Cu2-O43              | 86.4(3)   |
| O36-Zn1-O35                                                             | 109.5(4)  | O2-Cu2-O5 <sup>i</sup>  | 103.3(3)  |
| O36-Zn1-O33                                                             | 106.0(4)  | O2-Cu2-N3               | 94.0(4)   |
| O34-Zn1-O35                                                             | 107.5(4)  | O2-Cu2-N4               | 171.7(4)  |
| O34-Zn1-O33                                                             | 110.6(4)  | O43-Cu2-O5 <sup>i</sup> | 84.6(3)   |
| O34-Zn1-O36                                                             | 110.7(4)  | N3-Cu2-O43              | 167.5(4)  |
| O39 <sup>ii</sup> -Cu1-O1                                               | 90.6(3)   | N3-Cu2-O5 <sup>i</sup>  | 107.4(3)  |
| O39 <sup>ii</sup> -Cu1-N1                                               | 175.6(4)  | N3-Cu2-N4               | 82.3(4)   |
| O39 <sup>ii</sup> -Cu1-N2                                               | 94.9(4)   | N4-Cu2-O43              | 95.6(4)   |
| O1-Cu1-N1                                                               | 93.6(4)   | N4-Cu2-O5 <sup>i</sup>  | 84.9(3)   |
| O1-Cu1-N2                                                               | 174.5(4)  | O42-Cu3-N5              | 169.0(4)  |
| N2-Cu1-N1                                                               | 81.0(4)   | N5-Cu3-N6               | 82.2(4)   |
| O42-Cu3-N6                                                              | 92.5(4)   | N5-Cu3-O41              | 91.4(5)   |
| O42-Cu3-O41                                                             | 91.4(4)   | O41-Cu3-N6              | 164.9(4)  |
| Symmetry codes: (i) $-x+1/2, y-1/2, -z+1/2$ ; (ii) $-x+1, -y+1, -z+1$ . |           |                         |           |

**Table S2.** Continuous shape measures calculation for the Cu<sup>2+</sup> ions in **1-3**.

| Metal ions | Label   | Symmetry               | Shape                          | CShM value |
|------------|---------|------------------------|--------------------------------|------------|
| Cu1 in 1   | PP-5    | <i>D</i> <sub>5h</sub> | Pentagon                       | 29.895     |
|            | vOC-5   | <i>C</i> <sub>4v</sub> | Vacant octahedron              | 2.438      |
|            | TBPY-5  | <i>D</i> <sub>3h</sub> | Trigonal bipyramid             | 2.509      |
|            | SPY-5   | <i>C</i> <sub>4v</sub> | Spherical square pyramid       | 2.030      |
|            | JTBPY-5 | <i>D</i> <sub>3h</sub> | Johnson trigonal bipyramid J12 | 5.863      |
| Cu1 in 2   | PP-5    | <i>D</i> <sub>5h</sub> | Pentagon                       | 30.516     |
|            | vOC-5   | <i>C</i> <sub>4v</sub> | Vacant octahedron              | 2.269      |
|            | TBPY-5  | <i>D</i> <sub>3h</sub> | Trigonal bipyramid             | 2.516      |
|            | SPY-5   | <i>C</i> <sub>4v</sub> | Spherical square pyramid       | 2.021      |
|            | JTBPY-5 | <i>D</i> <sub>3h</sub> | Johnson trigonal bipyramid J12 | 6.912      |
| Cu2 in 3   | PP-5    | <i>D</i> <sub>5h</sub> | Pentagon                       | 24.551     |
|            | vOC-5   | <i>C</i> <sub>4v</sub> | Vacant octahedron              | 1.954      |
|            | TBPY-5  | <i>D</i> <sub>3h</sub> | Trigonal bipyramid             | 6.251      |
|            | SPY-5   | <i>C</i> <sub>4v</sub> | Spherical square pyramid       | 1.572      |
|            | JTBPY-5 | <i>D</i> <sub>3h</sub> | Johnson trigonal bipyramid J12 | 9.078      |

**Table S3.** The bond-valence sum (BVS) calculations of W, Zn and Cu for **1-3**.

| Compound 1 |                  | Compound 2 |                  | Compound 3 |                  |
|------------|------------------|------------|------------------|------------|------------------|
| Atom       | Oxidation states | Atom       | Oxidation states | Atom       | Oxidation states |
| W1         | 6.20             | W1         | 5.75             | W1         | 6.17             |
| W2         | 6.16             | W2         | 6.05             | W2         | 6.06             |
| W3         | 6.12             | W3         | 5.94             | W3         | 6.14             |
| W4         | 5.95             | W4         | 6.04             | W4         | 6.08             |
| W5         | 6.07             | W5         | 5.80             | W5         | 6.18             |
| W6         | 5.99             | W6         | 5.95             | W6         | 6.20             |
| W7         | 6.16             | W7         | 6.09             | W7         | 6.02             |
| W8         | 6.15             | W8         | 6.25             | W8         | 5.99             |
| W9         | 6.08             | W9         | 6.22             | W9         | 5.97             |
| W10        | 6.11             | W10        | 6.15             | W10        | 6.00             |
| W11        | 6.10             | W11        | 6.15             | W11        | 6.15             |
| W12        | 6.13             | W12        | 6.14             | W12        | 6.07             |
| Zn1        | 2.66             | Zn1        | 2.35             | Zn1        | 2.69             |
| Cu1        | 2.08             | Cu1        | 2.04             | Cu1        | 1.91             |
| Cu2        | 2.12             | Cu2        | 2.01             | Cu2        | 2.02             |
| Cu3        | 2.16             |            |                  | Cu3        | 1.91             |

**Table S4.** Summary of the photocatalytic toluene oxidation over many photocatalysts.

| Catalyst                          | Substrate | T/°C | Light source  | Solvent            | Oxidant        | Conv. /% | Sel. /% | Ref.      |
|-----------------------------------|-----------|------|---------------|--------------------|----------------|----------|---------|-----------|
| <i>p</i> -BWO                     | 1 mmol    | RT   | > 400 nm      | CH <sub>3</sub> CN | O <sub>2</sub> | 97       | 91      | 1         |
| WO <sub>3</sub> /TiO <sub>2</sub> | 50 μmol   | RT   | > 300 nm      | CH <sub>3</sub> CN | O <sub>2</sub> | 50       | 50      | 2         |
| CdS                               | 0.2 mmol  | 60   | visible light | CH <sub>3</sub> CN | O <sub>2</sub> | 13       | 52.5    | 3         |
| Bi <sub>2</sub> WO <sub>6</sub>   | 8 mmol    | RT   | visible light | none               | O <sub>2</sub> | 0.5      | 95      | 4         |
| Nb <sub>2</sub> O <sub>5</sub> -N | 0.1 mmol  | 40   | 455 nm        | CH <sub>3</sub> CN | O <sub>2</sub> | 1.56     | 96      | 5         |
| NbBA                              | 1 mmol    | 30   | UV            | none               | O <sub>2</sub> | 27       | 54      | 6         |
|                                   |           | 45   | visible light | none               | O <sub>2</sub> | 15       | 70      |           |
| Fe-UiO-66                         | 50 μmol   | RT   | UV            | CH <sub>3</sub> CN | O <sub>2</sub> | 70.1     | 19.3    | 7         |
| Compound3                         | 1 mmol    | RT   | > 420 nm      | CH <sub>3</sub> CN | O <sub>2</sub> | 17.3     | 97.6    | This work |

RT: room temperature; BA: benzyl alcohol.

**Table S5.** Photocatalytic oxidation of toluene under different catalysts.

| Entry | Catalyst                                                                                | t/h | Atm            | Conv. (%) | Sel. (%) |
|-------|-----------------------------------------------------------------------------------------|-----|----------------|-----------|----------|
| 1     | (Me <sub>4</sub> N) <sub>6</sub> [ZnW <sub>12</sub> O <sub>40</sub> ]·9H <sub>2</sub> O | 12  | O <sub>2</sub> | 2.3       | 25.0     |
| 2     | [Cu(bipy)(H <sub>2</sub> O) <sub>3</sub> ]·(NO <sub>3</sub> ) <sub>2</sub>              | 12  | O <sub>2</sub> | < 1       | -        |

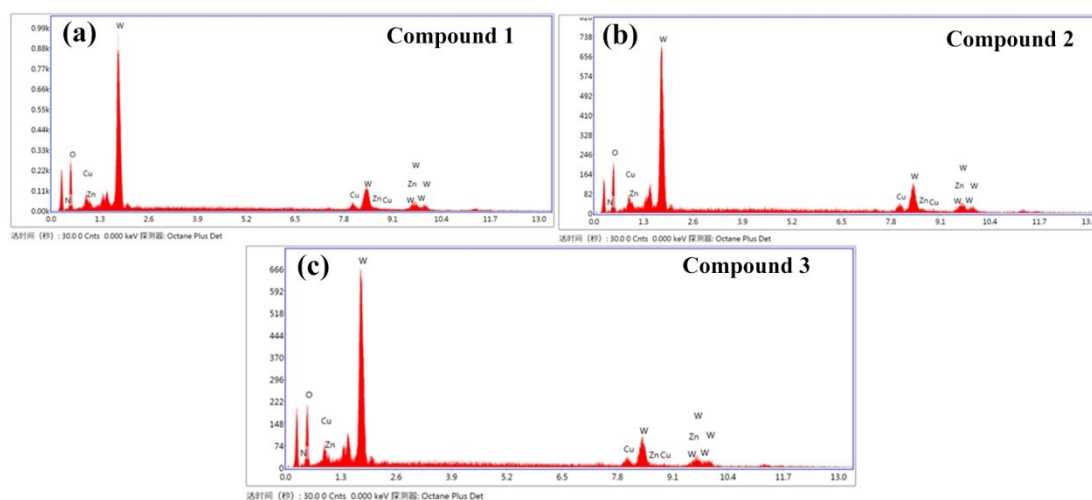**Fig. S1** Energy dispersive X-ray spectroscopy (EDS) of **1** (a), **2** (b) and **3** (c), respectively.

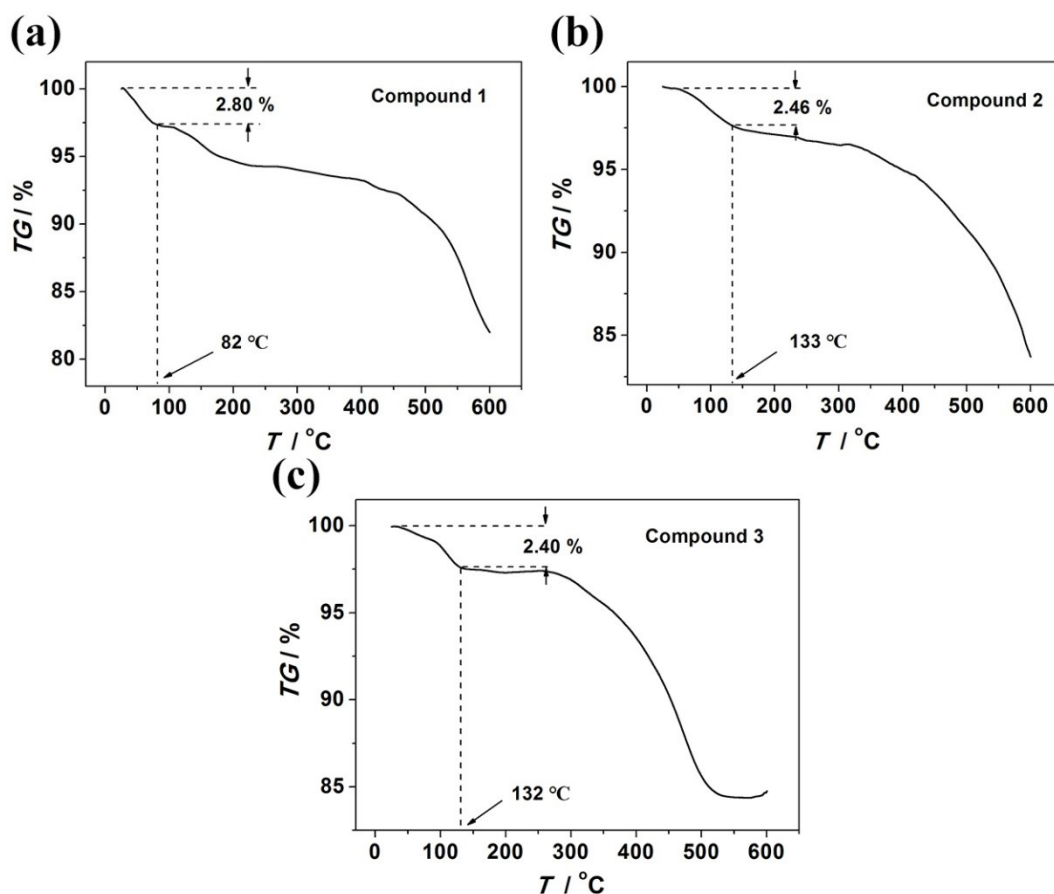

**Fig. S2** TGA curves of **1** (a), **2** (b) and **3** (c), respectively.

The thermogravimetric analysis (TGA) of compound **1** (Fig. S2a) shows that it went through a weight loss of 2.80 % in the temperature range of 25–82 °C, corresponding to the weight loss of six free lattice H<sub>2</sub>O molecules (calc. 2.87%); this result is consistent with the content of H in free lattice water by elemental analysis. After that, its framework started to collapse with a series of complicated weight losses. For compound **2-3**, the thermogravimetric (TG) behaviors are very similar to each other. Herein only the TG behavior of **3** is described as the representatives. TGA of **3** (Fig. S2c) shows that it went through a weight loss of 2.40 % in the temperature range of 25–132 °C, corresponding to the weight loss of five free lattice H<sub>2</sub>O molecules (calc. 2.44%); this result is also consistent with the content of H in free lattice water by elemental analysis. Then, its framework kept stable until approximately 270 °C. After that, its framework started to collapse with a series of complicated weight losses.

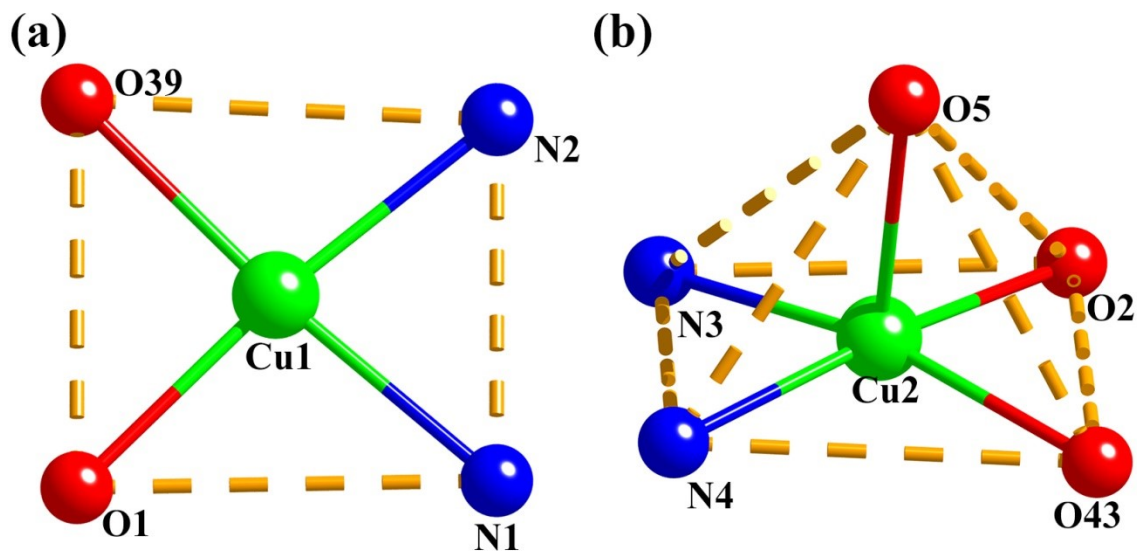

Fig. S3 Coordination geometries of Cu1 and Cu2, respectively, of compound 3.

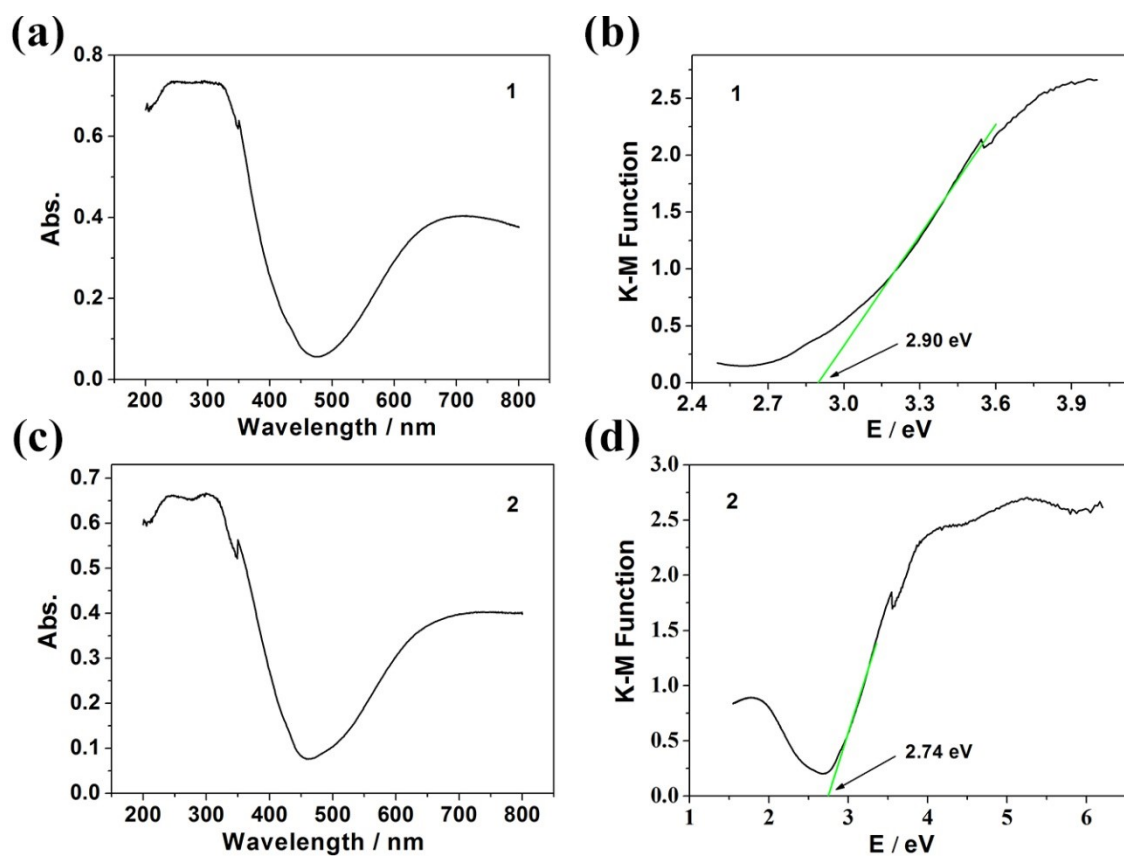

Fig. S4 UV-vis diffuse reflectance spectra of 1 (a) and 2 (c) respectively, diffuse reflectance UV-vis-NIR spectra of K-M functions versus energy (eV) of 1 (b) and 2 (d).

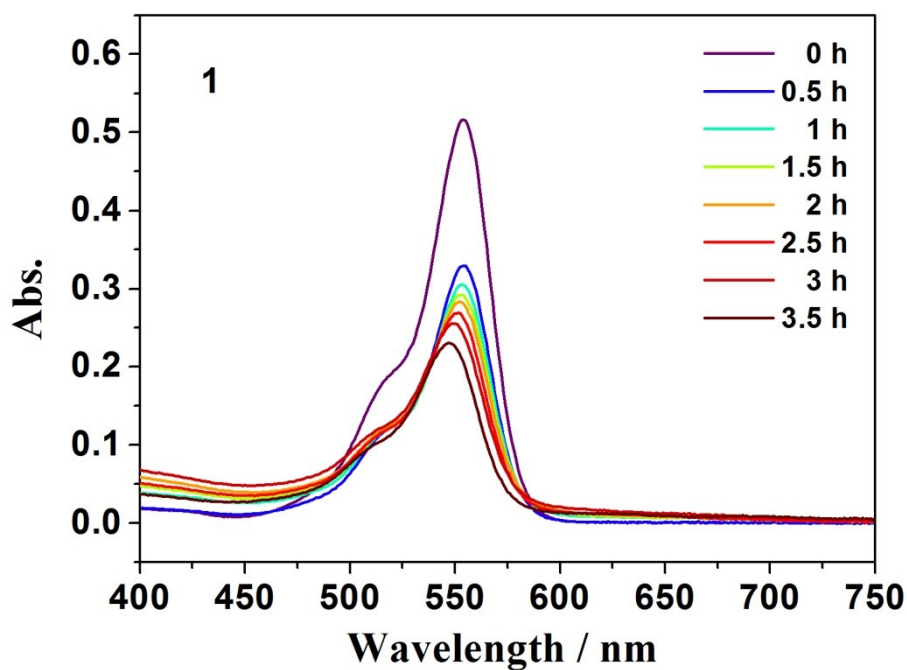

Fig. S5 Absorption spectra of RhB solution in the presence of 1 under visible light.

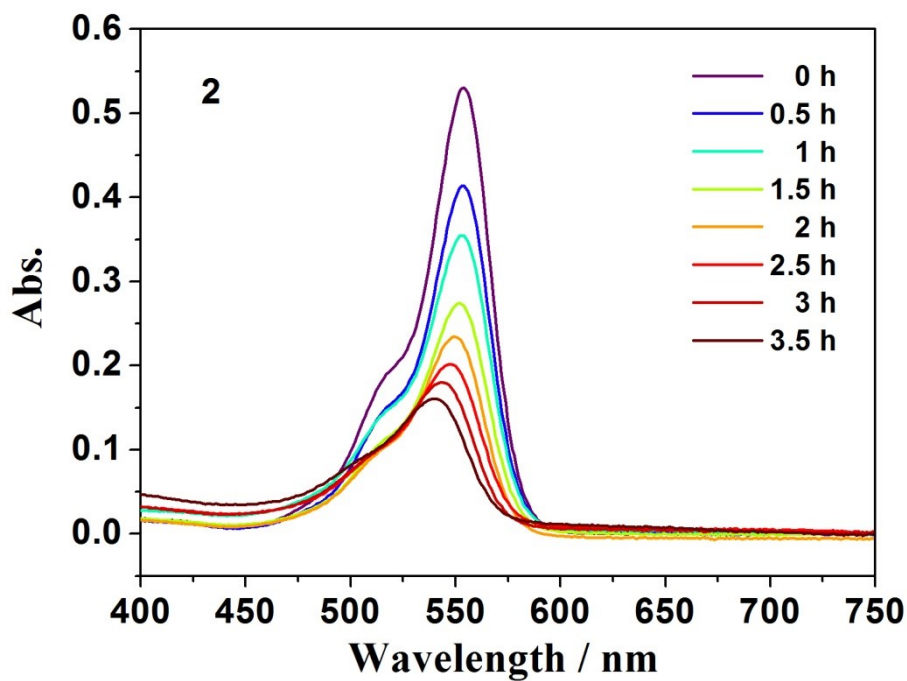

Fig. S6 Absorption spectra of RhB solution in the presence of 2 under visible light.



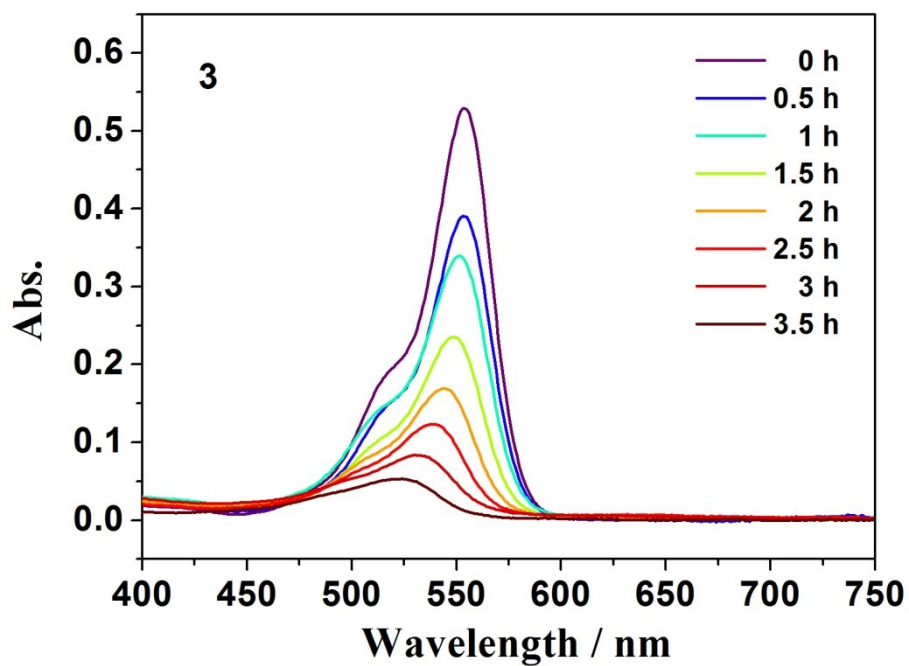

Fig. S7 Absorption spectra of RhB solution in the presence of **3** under visible light.

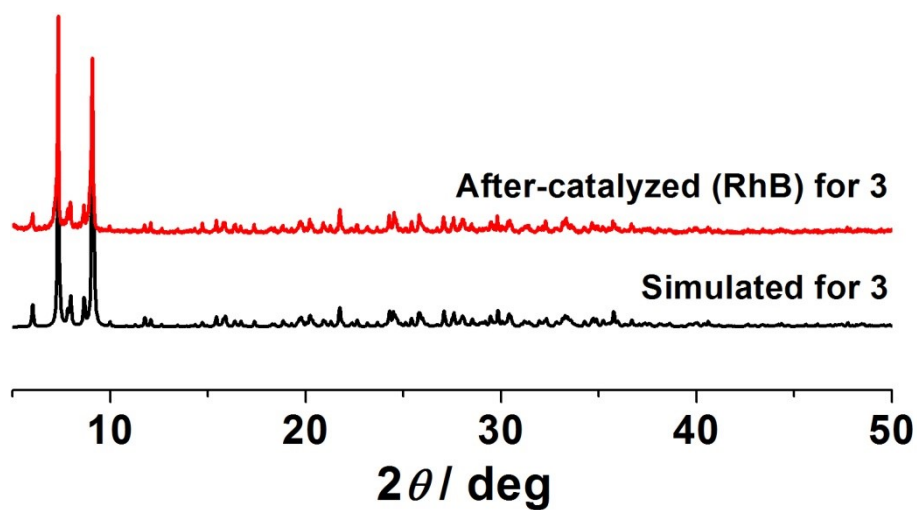

Fig. S8 PXRD patterns of **3** after (red) photocatalytic degradation of RhB and its simulated one (black).

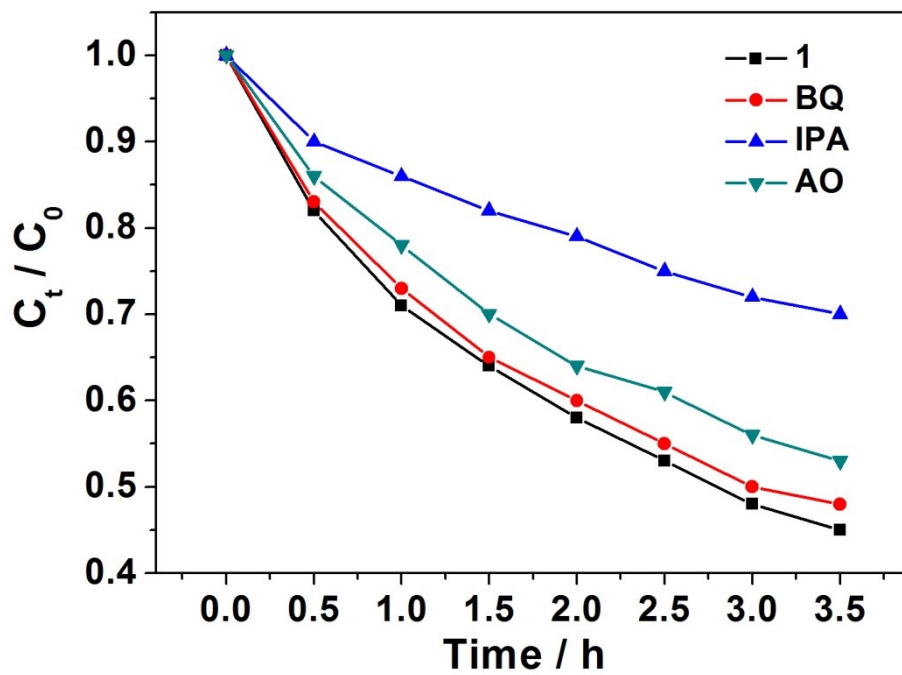

Fig. S9 Photocatalytic degradation of RhB by 1 in the presence of different radical scavengers.

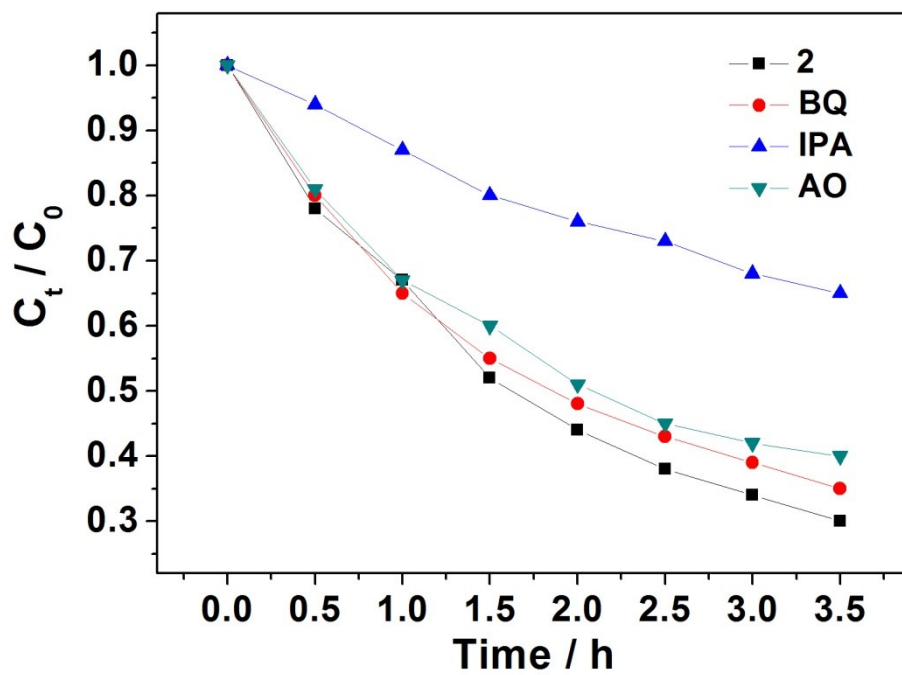

Fig. S10 Photocatalytic degradation of RhB by 2 in the presence of different radical scavengers.

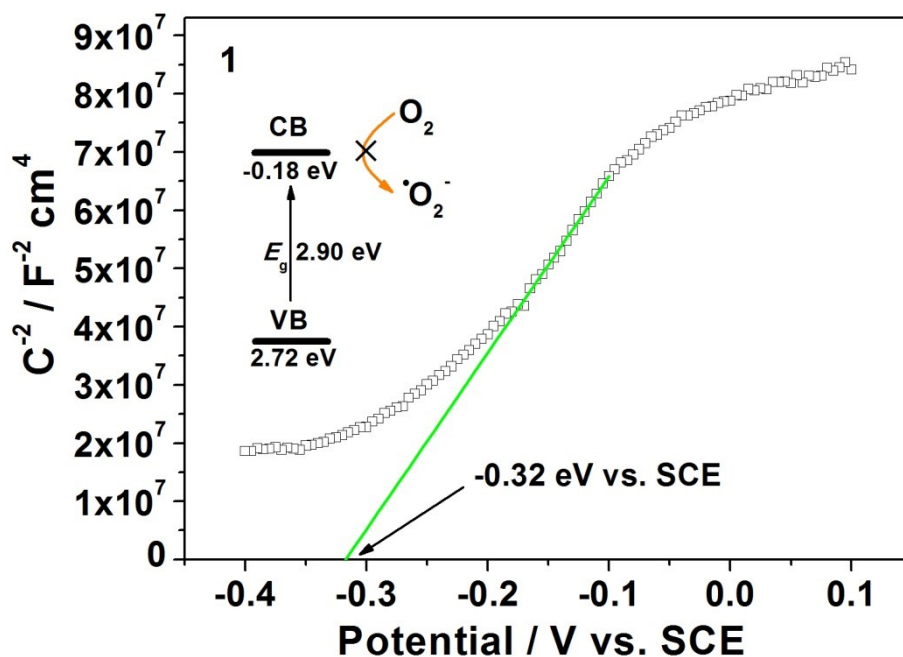

Fig. S11 Mott-Schottky plot of 1 at a frequency of 1.0 kHz.

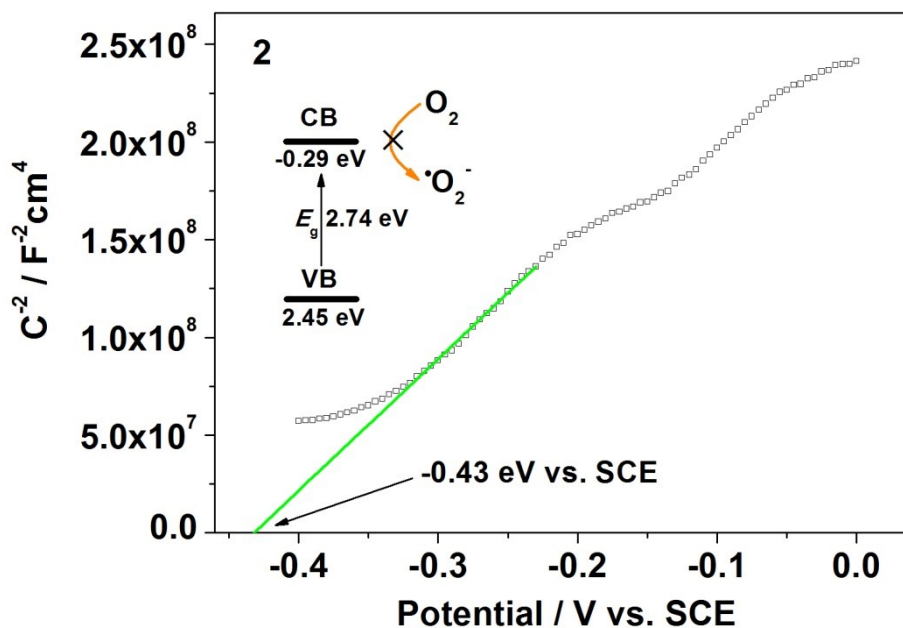

Fig. S12 Mott-Schottky plot of 2 at a frequency of 1.0 kHz.

## References

- 1 X. Cao, Z. Chen, R. Lin, W.C. Cheong, S. Liu, J. Zhang, Q. Peng, C. Chen, T. Han, X. Tong, Y. Wang, R. Shen, W. Zhu, D. Wang and Y. Li, *Nat. Catal.*, 2018, **1**, 704-710.
- 2 D. Tsukamoto, Y. Shiraishi and T. Hirai, *Catal. Sci. Technol.*, 2013, **3**, 2270-2277.
- 3 G. Zhao, B. Hu, G. Wilma-Busser, B. Peng and M. Muhler, *ChemSusChem.*, 2019, **12**, 2795-2801.

- 4 Y. Liu, L. Chen, Q. Yuan, J. He, C.T. Au and S.F. Yin, *Chem. Commun.*, 2016, **52**, 1274-1277.
- 5 K. Su, H. Liu, B. Zeng, Z. Zhang, N. Luo, Z. Huang, Z. Gao and F. Wang, *ACS Catal.*, 2020, **10**, 1324-1333.
- 6 S. Sarina, H. Zhu, Z. Zheng, S. Bottle, J. Chang, X. Ke, J. C. Zhao, Y. Huang, A. Sutrisno, M. Willansc and G. Li, *Chem. Sci.*, 2012, **3**, 2138-2146.
- 7 C. Xu, Y. Pan, G. Wan, H. Liu, L. Wang, H. Zhou, S. H. Yu and H. L. Jiang, *J. Am. Chem. Soc.*, 2019, **141**, 19110-19117.
